# Supplementary material for: Easily measurable pH as an indicator of the effectiveness of the aqueous cholinium ionic liquid-based pretreatment of lignocellulose
Source: Royal Society of Chemistry journal article supplement (doi:10.1039/c4ra10134k), 2014-01-01
Supplement: c4ra10134k1.pdf [file c4ra10134k1.pdf]

Supplementary data for

Easily measurable pH as an indicator of aqueous cholinium  
ionic liquid pretreatment effectiveness of lignocellulose

Yan-Xia An,<sup>a</sup> Ning Li,<sup>\*a</sup> Min-Hua Zong,<sup>\*a</sup> Wen-Yong Lou<sup>a</sup>

<sup>a</sup> State Key Laboratory of Pulp and Paper Engineering, College of Light Industry and Food Sciences, South China University of Technology, Guangzhou 510640, China

\*Corresponding authors.

Dr. N. Li, Tel/Fax: +86 20 2223 6669; Email: [lining@scut.edu.cn](mailto:lining@scut.edu.cn).

Prof. M. H. Zong, Tel: +86 20 8711 1452; Fax: +86 20 2223 6669; Email: [btmhzong@scut.edu.cn](mailto:btmhzong@scut.edu.cn)

**X-ray diffraction (XRD) analysis**

The samples were scanned on a D8 ADVANCE diffractometer (Brüker, German) from  $2\theta = 5-60^\circ$  with a scan speed of  $0.07^\circ \text{ min}^{-1}$  and a step size of  $0.04^\circ$  at 40 kV, 40 mA. The peak height method was also used:  $\text{CrI} = (I_{002} - I_{\text{am}}) / I_{002} * 100$ , in which  $I_{002}$  is the intensity of the crystalline portion of biomass (cellulose) at  $2\theta \approx 22.5^\circ$ , and  $I_{\text{am}}$  is the peak intensity of the amorphous portion at  $2\theta \approx 18.2^\circ$ .

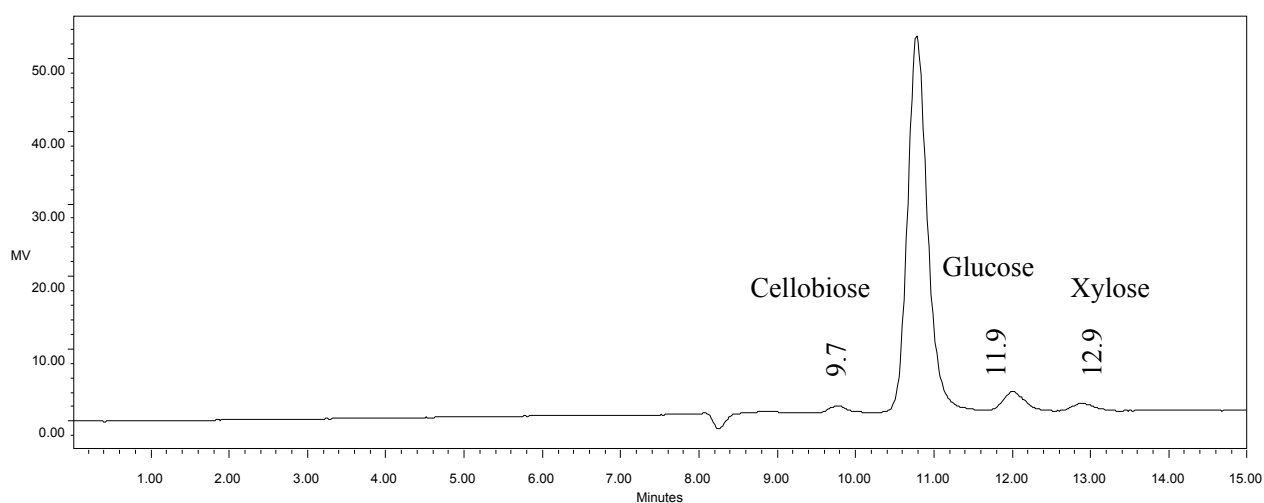

Figure S1 HPLC spectrum of the reaction mixture in the enzymatic hydrolysis of rice straw

Table S1 Effect of 50% IL aqueous solution pretreatment on the composition and enzymatic hydrolysis of rice straw

| ILs                     | Pretreatment <sup>a</sup> |                      |                       | Composition of residues (%) <sup>b</sup> |       |      |      | Enzymatic hydrolysis of residues <sup>c</sup> |        |
|-------------------------|---------------------------|----------------------|-----------------------|------------------------------------------|-------|------|------|-----------------------------------------------|--------|
|                         | pH                        | Lignin extracted (%) | Residues recovery (%) | Cellulose                                | Xylan | AIL  | ASL  | Sugar yield (%)                               |        |
|                         |                           |                      |                       |                                          |       |      |      | Glucose                                       | Xylose |
| Untreated               | –                         | 0                    | 100                   | 36.9                                     | 18.4  | 16.7 | 2.1  | 20.0                                          | 11.5   |
| [Ch][For]               | 7.71                      | 20.5                 | 77.7                  | 43.0                                     | 19.6  | 16.9 | 1.6  | 38.2                                          | 18.2   |
| [Ch][AcO]               | 8.43                      | 33.4                 | 71.8                  | 45.4                                     | 20.6  | 15.2 | 1.7  | 37.6                                          | 17.6   |
| [Ch][But]               | 8.62                      | 33.5                 | 68.0                  | 47.4                                     | 21.4  | 15.3 | 1.5  | 36.3                                          | 17.8   |
| [Ch][Piv]               | 8.65                      | 45.4                 | 66.0                  | 51.1                                     | 22.3  | 12.4 | 1.4  | 49.0                                          | 19.2   |
| [Ch][Hex]               | 8.56                      | 40.0                 | 67.5                  | 47.4                                     | 20.1  | 12.7 | 1.2  | 41.8                                          | 16.1   |
| [Ch][iOct]              | 8.59                      | 49.8                 | 66.8                  | 48.8                                     | 22.7  | 12.2 | 1.1  | 52.3                                          | 40.4   |
| [Ch][TFA]               | 7.58                      | 31.8                 | 74.2                  | 43.8                                     | 19.6  | 15.1 | 1.4  | 32.6                                          | 9.6    |
| [Ch][Nic]               | 7.85                      | 29.5                 | 77.4                  | 39.9                                     | 19.9  | 13.0 | 1.4  | 30.9                                          | 15.4   |
| [Ch][Bz]                | 7.57                      | 24.4                 | 78.5                  | 39.8                                     | 18.5  | 14.6 | 1.4  | 27.8                                          | 13.3   |
| [Ch][Glc]               | 7.45                      | 10.6                 | 78.0                  | 40.4                                     | 21.4  | 16.5 | 1.7  | 29.8                                          | 16.5   |
| [Ch][Lac]               | 6.10                      | 13.3                 | 77.6                  | 39.8                                     | 21.7  | 16.6 | 1.4  | 22.8                                          | 12.6   |
| [Ch][Oxa]               | 3.02                      | 11.4                 | 80.7                  | 39.3                                     | 18.6  | 16.0 | 1.4  | 26.0                                          | 14.1   |
| [Ch] <sub>2</sub> [Oxa] | 6.35                      | 20.0                 | 79.3                  | 40.1                                     | 19.1  | 14.1 | 1.5  | 35.3                                          | 20.4   |
| [Ch][Suc]               | 5.03                      | 10.9                 | 80.9                  | 39.1                                     | 19.3  | 15.5 | 1.7  | 29.4                                          | 14.3   |
| [Ch] <sub>2</sub> [Suc] | 7.72                      | 21.2                 | 76.7                  | 41.5                                     | 19.4  | 14.3 | 1.7  | 34.2                                          | 18.6   |
| [Ch][Mal]               | 4.50                      | 11.0                 | 79.3                  | 38.8                                     | 18.4  | 16.5 | 1.4  | 22.9                                          | 11.8   |
| [Ch] <sub>2</sub> [Mal] | 8.63                      | 43.4                 | 65.0                  | 40.9                                     | 17.8  | 12.3 | 1.4  | 45.6                                          | 20.0   |
| [Ch][Gly]               | 11.56                     | 59.4                 | 57.1                  | 56.5                                     | 18.9  | 9.7  | 1.40 | 81.8                                          | 48.6   |
| [Ch][Boc-Gly]           | 8.86                      | 40.7                 | 67.3                  | 41.4                                     | 19.0  | 13.3 | 1.2  | 35.1                                          | 22.3   |
| [Ch][Cbz-Gly]           | 10.03                     | 50.0                 | 63.2                  | 44.1                                     | 21.5  | 12.8 | 1.2  | 47.0                                          | 33.2   |
| [Ch][Ala]               | 11.70                     | 60.1                 | 57.3                  | 56.1                                     | 21.9  | 10.1 | 1.22 | 81.0                                          | 43.8   |
| [Ch][Ser]               | 10.76                     | 52.6                 | 61.6                  | 54.9                                     | 18.1  | 13.6 | 1.22 | 83.8                                          | 49.0   |
| [Ch][Thr]               | 10.98                     | 53.9                 | 63.9                  | 51.3                                     | 20.5  | 12.1 | 1.22 | 80.9                                          | 48.5   |
| [Ch][Val]               | 11.19                     | 60.9                 | 58.4                  | 55.6                                     | 19.9  | 7.4  | 1.34 | 79.0                                          | 42.5   |
| [Ch][Leu]               | 11.75                     | 58.9                 | 60.1                  | 53.2                                     | 20.6  | 9.9  | 1.18 | 81.4                                          | 48.4   |
| [Ch][Ile]               | 11.36                     | 38.4                 | 61.7                  | 49.6                                     | 17.3  | 15.4 | 1.16 | 77.2                                          | 46.7   |
| [Ch][Met]               | 11.33                     | 61.2                 | 62.4                  | 57.1                                     | 16.2  | 8.5  | 1.34 | 83.5                                          | 44.3   |
| [Ch][Pro]               | 11.60                     | 62.2                 | 56.6                  | 56.3                                     | 21.0  | 11.5 | 1.27 | 79.5                                          | 43.6   |
| [Ch][Phe]               | 11.08                     | 56.6                 | 70.2                  | 48.6                                     | 19.8  | 11.9 | 1.06 | 81.7                                          | 47.5   |
| [Ch][Gln]               | 11.18                     | 53.8                 | 63.4                  | 45.9                                     | 20.1  | 12.0 | 1.31 | 68.8                                          | 39.1   |
| [Ch][Asp]               | 7.43                      | 12.2                 | 95.4                  | 40.3                                     | 23.0  | 16.0 | 1.41 | 33.9                                          | 10.4   |

|                                    |       |      |      |      |      |      |      |      |      |
|------------------------------------|-------|------|------|------|------|------|------|------|------|
| [Ch] <sub>2</sub> [Asp]            | 11.06 | 68.9 | 52.9 | 48.4 | 19.8 | 8.8  | 0.8  | 56.4 | 37.1 |
| [Ch][Glu]                          | 7.80  | 13.2 | 91.7 | 39.5 | 20.1 | 15.7 | 1.35 | 31.9 | 9.6  |
| [Ch][Arg]                          | 11.46 | 76.5 | 42.7 | 69.0 | 17.4 | 5.4  | 1.15 | 75.1 | 27.8 |
| [Ch][Lys]                          | 11.88 | 58.9 | 56.8 | 61.8 | 21.6 | 11.3 | 1.21 | 86.2 | 47.8 |
| [Ch][His]                          | 11.30 | 52.8 | 57.7 | 55.4 | 18.6 | 11.7 | 1.44 | 70.3 | 37.9 |
| [Ch][AcO]-[Ch][Gly]<br>(1:1, w/w)  | 10.95 | 66.1 | 52.6 | 50.8 | 20.0 | 8.9  | 0.7  | 63.9 | 44.4 |
| [Ch][iOct]-[Ch][Gly]<br>(1:1, w/w) | 10.90 | 73.8 | 50.3 | 54.4 | 20.7 | 7.9  | 0.7  | 69.5 | 47.4 |
| [Ch][Bz]-[Ch][Gly]<br>(1:1, w/w)   | 10.84 | 73.1 | 51.6 | 52.9 | 20.3 | 8.7  | 0.7  | 69.0 | 49.8 |

<sup>a</sup> 300 mg Samples of rice straw were incubated in 6 g of aqueous IL solution under N<sub>2</sub> with stirring at 90°C for 6 h.

<sup>b</sup> Determined via the NREL protocol (LAP version 2008). Results are expressed as a percentage of the residues. AIL, acid-insoluble lignin; ASL, acid-soluble lignin.

<sup>c</sup> Reaction conditions: 20 mg recovered rice straw, 7 mL citrate buffer (50 mM, pH 4.8), 35 U mL<sup>-1</sup> cellulase from *Trichoderma reesei*, 50°C, 200 rpm.

Abbreviations: formate (For); acetate (AcO); butyrate (But); pivalate (Piv); hexanoate (Hex); i-octanoate (iOct); trifluoroacetic acid (TFA); nicotinic acid (Nic); benzoate (Bz); glycolate (Glc); lactate (Lac); oxalate (Oxa); succinate (Suc); malate (Mal); glycinate (Gly); N-Boc-glycinate (Boc-Gly); N-Cbz-glycinate (Cbz-Gly); alaninate (Ala); serine (Ser); threoninate (Thr); valinate (Val); leucinate (Leu); isoleucinate (Ile); methioninate (Met); proline (Pro); phenylalaninate (Phe); glutaminate (Gln); aspartate (Asp); glutamate (Glu); arginate (Arg); lysinate (Lys); histidinate (His)

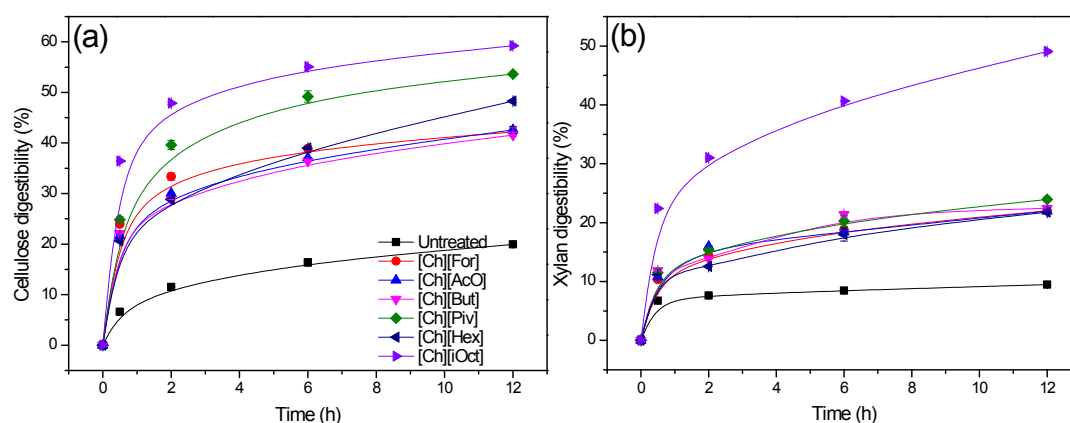

Figure S2 Time courses of enzymatic hydrolysis of rice straw before and after 50% IL aqueous solution pretreatment: (a) cellulose; (b) xylan

Reaction conditions: 20 mg recovered rice straw, 7 mL citrate buffer (50 mM, pH 4.8), 35 U mL<sup>-1</sup> cellulase from *Trichoderma reesei*, 50°C, 200 rpm.

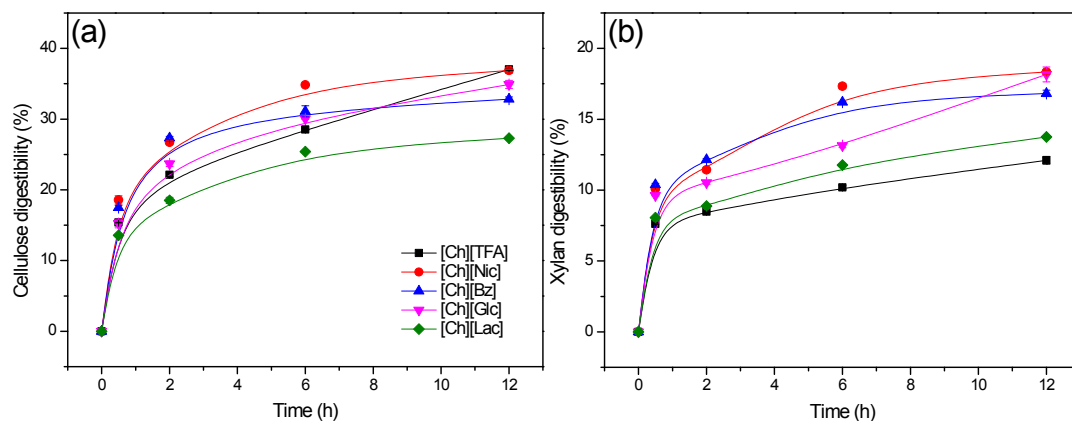

Figure S3 Time courses of enzymatic hydrolysis of rice straw after 50% IL aqueous solution pretreatment: (a) cellulose; (b) xylan

Reaction conditions: 20 mg recovered rice straw, 7 mL citrate buffer (50 mM, pH 4.8), 35 U mL<sup>-1</sup> cellulase from *Trichoderma reesei*, 50°C, 200 rpm.

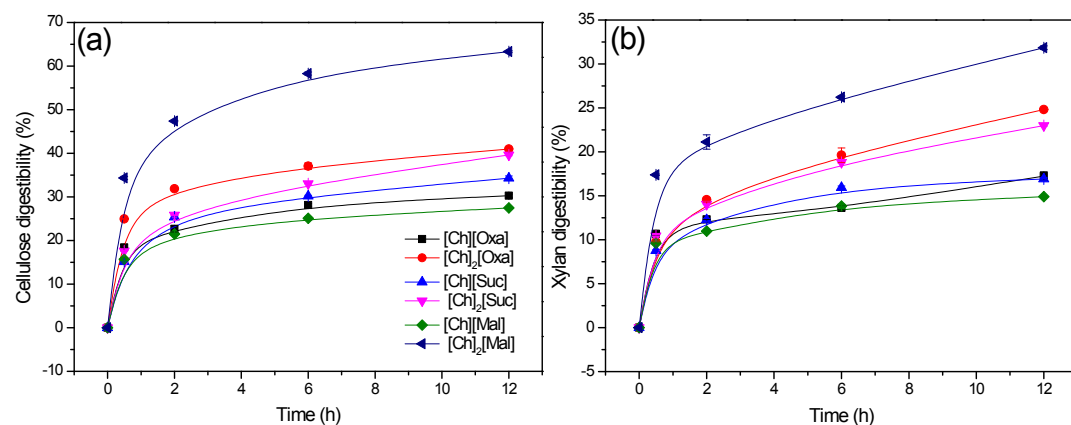

Figure S4 Time courses of enzymatic hydrolysis of rice straw after 50% IL aqueous solution pretreatment: (a) cellulose; (b) xylan

Reaction conditions: 20 mg recovered rice straw, 7 mL citrate buffer (50 mM, pH 4.8), 35 U mL<sup>-1</sup> cellulase from *Trichoderma reesei*, 50°C, 200 rpm.

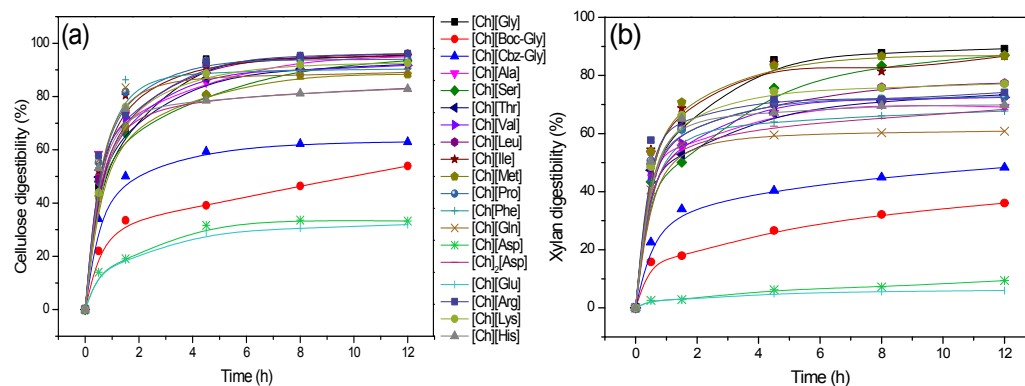

Figure S5 Time courses of enzymatic hydrolysis of rice straw after 50% IL aqueous solution pretreatment: (a) cellulose; (b) xylan

Reaction conditions: 20 mg recovered rice straw, 7 mL citrate buffer (50 mM, pH 4.8), 35 U mL<sup>-1</sup>

cellulase from *Trichoderma reesei*, 50°C, 200 rpm.

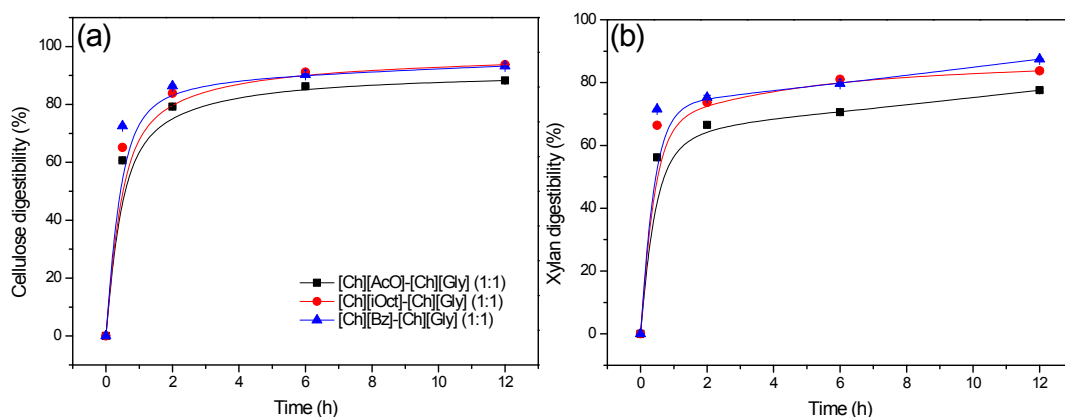

Figure S6 Time courses of enzymatic hydrolysis of rice straw after 50% IL aqueous solution pretreatment: (a) cellulose; (b) xylan

Reaction conditions: 20 mg recovered rice straw, 7 mL citrate buffer (50 mM, pH 4.8), 35 U mL<sup>-1</sup> cellulase from *Trichoderma reesei*, 50°C, 200 rpm.

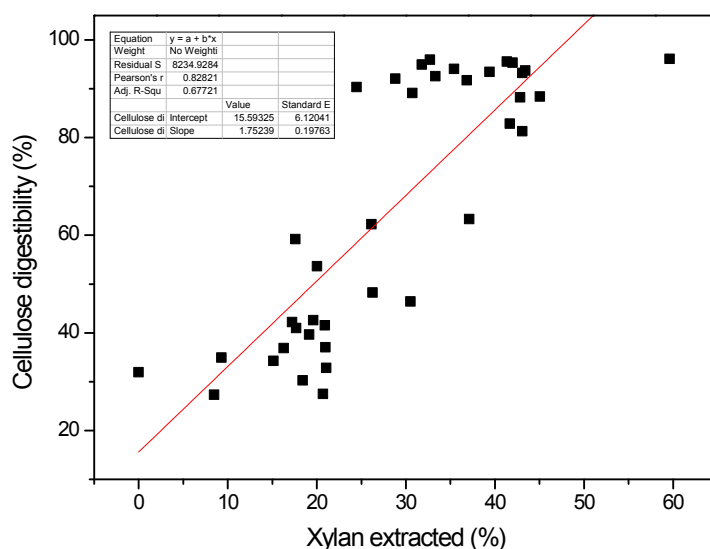

Figure S7 Correlation between xylan extracted and cellulose digestibility

The xylan extracted was calculated on the base of the changes in xylan content before and after

$$\text{pretreatment: Xylan extracted (\%)} = \left(1 - \frac{\text{Residues recovery} \times \text{xylan content in residues}}{\text{Native xylan content}}\right) \times 100$$

Table S2 Cellulose CrI of untreated and neat IL-treated rice straw

| ILs        | Cellulose CrI (%) <sup>a</sup> |
|------------|--------------------------------|
| Untreated  | 59.6                           |
| [Ch][For]  | 66.4                           |
| [Ch][AcO]  | 72.3                           |
| [Ch][But]  | 76.6                           |
| [Ch][Piv]  | 80.0                           |
| [Ch][Hex]  | 72.6                           |
| [Ch][iOct] | 69.3                           |

---

|                         |      |
|-------------------------|------|
| [Ch][TFA]               | 65.9 |
| [Ch][Nic]               | 65.0 |
| [Ch][Bz]                | 71.6 |
| [Ch][Glc]               | 71.5 |
| [Ch][Lac]               | 64.7 |
| [Ch][Oxa]               | 70.5 |
| [Ch] <sub>2</sub> [Oxa] | 66.5 |
| [Ch][Mal]               | 65.7 |
| [Ch] <sub>2</sub> [Mal] | 65.2 |
| [Ch][suc]               | 70.6 |
| [Ch] <sub>2</sub> [suc] | 66.4 |
| [Ch][Gly]               | 80.7 |
| [Ch][Boc-Gly]           | 68.5 |
| [Ch][Cbz-Gly]           | 69.1 |
| [Ch][Ala]               | 77.2 |
| [Ch][Asp]               | 62.1 |
| [Ch] <sub>2</sub> [Asp] | 73.1 |

---

<sup>a</sup> Crystallinity index (CrI) was calculated by the peak height method:  $CrI = [(I_{002} - I_{am}) / I_{002}] * 100$
